# Supplementary material for: Structured exploration of machine learning model complexity for spatio-temporal forecasting of urban flooding
Source: Copernicus journal article supplement (doi:10.5194/egusphere-2024-551), 2024-03-15

# Increase in SF (%)

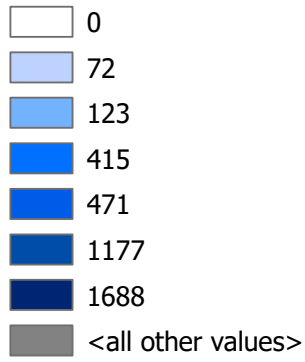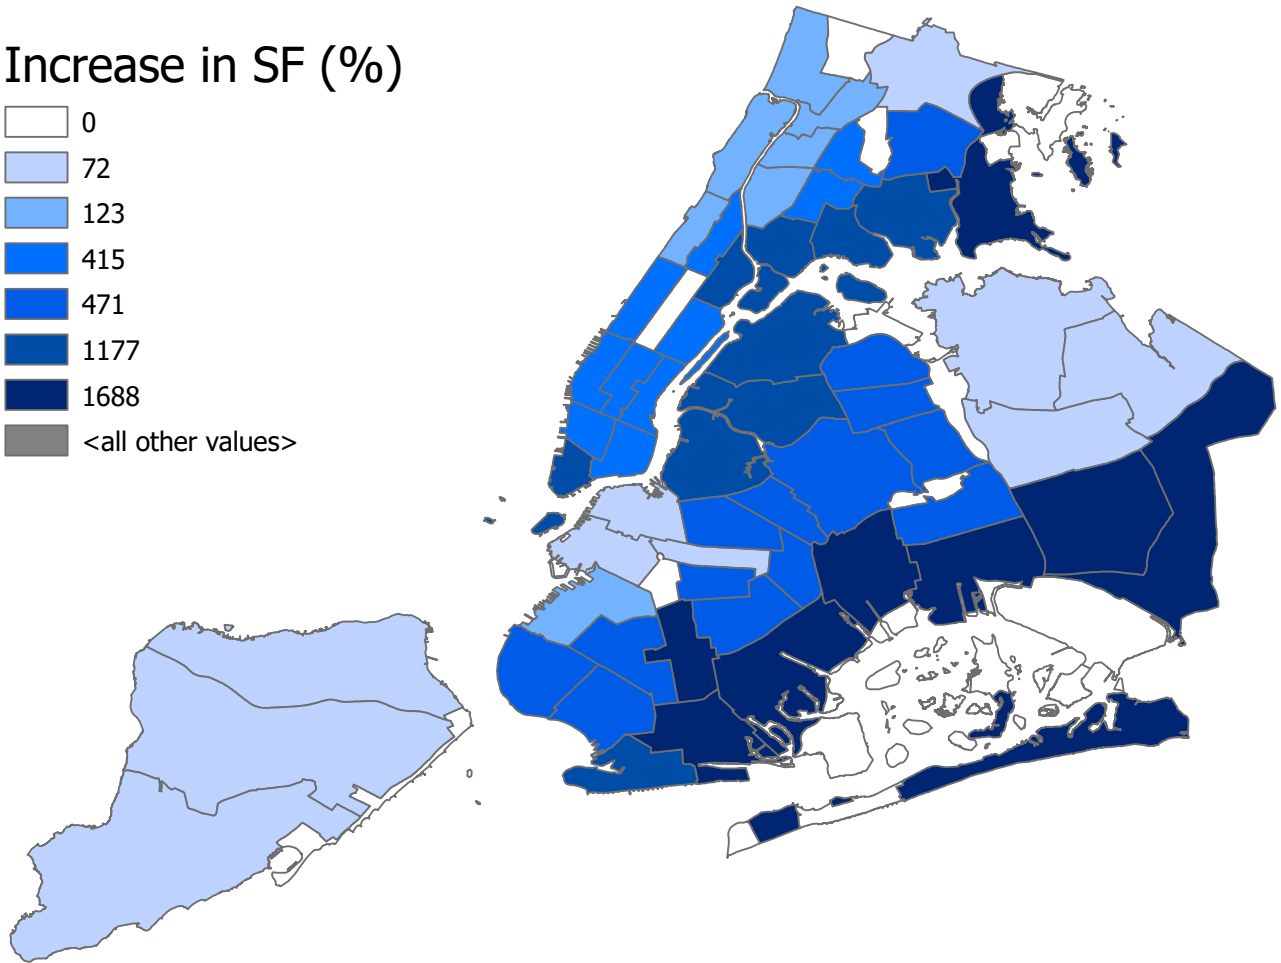

Supplement: Supplementary file [file egusphere-2024-551-AC1-supplement.pdf]
